# Supplementary material
Source: MDPI journal article supplement (https://www.mdpi.com/2076-393X/11/12/1820)
Supplement: s1 [file s1]

Archive with 1 entries (1 files):
- vaccines-2665446-supplementary.pdf
